# Supplementary material
Source: publisher figshare collection journal article supplement (https://tandf.figshare.com/ndownloader/files/13686032)
Supplement: Supplementary file 1 [file 13686032]

# SUPPLEMENTAL DATA

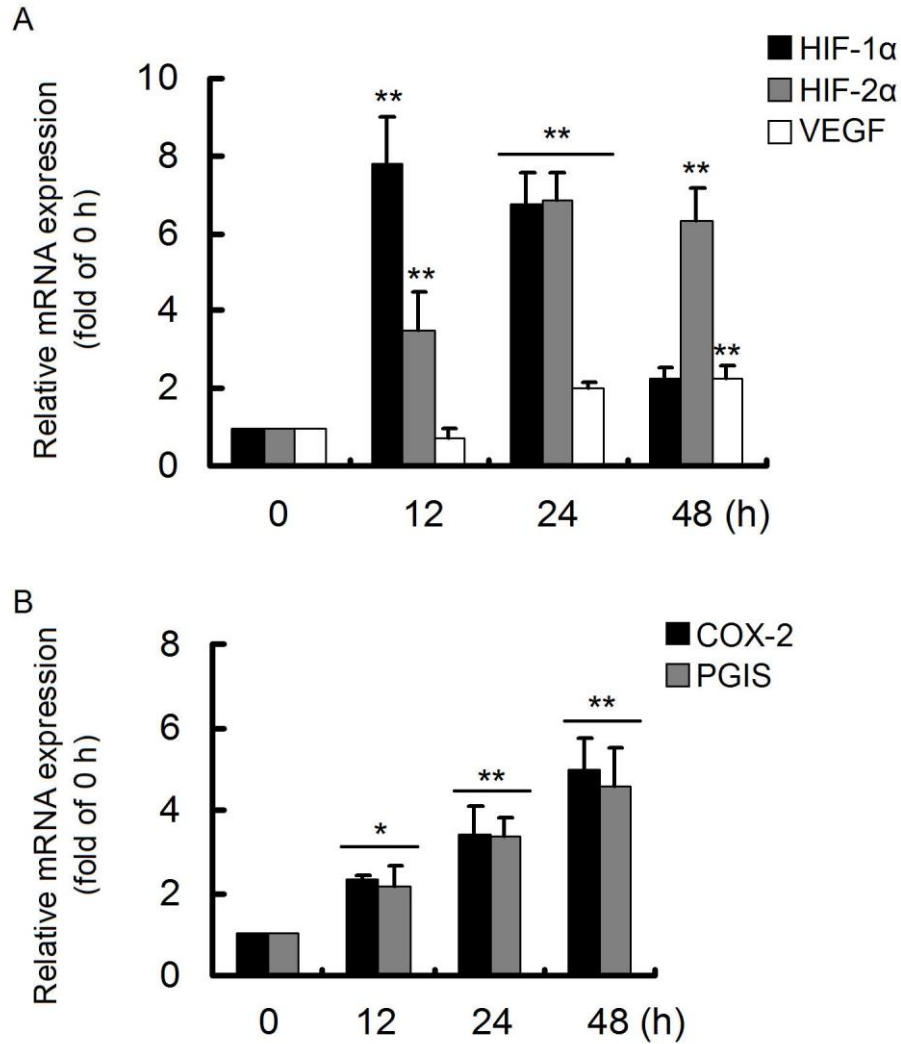

**Supplemental Figure 1.** The disordered gene mRNAs in hypoxia-activated macrophages. (A) The time-dependent changes of HIF-1 $\alpha$ , HIF-2 $\alpha$  and VEGF. (B) The time-dependent changes of COX-2 and PGIS. \*\* $P < 0.01$  or \* $P < 0.05$ , vs 0 h group. The data were repeated three times and represented as mean  $\pm$  SD.
